# Supplementary material
Source: publisher figshare collection journal article supplement (https://gsapubs.figshare.com/articles/dataset/_/12542927)
Supplement: Supplementary file 1 [file 1]

Yunshuai Li, Jianxin Zhang, Shengyao Yu, Yanguang Li, Hu Guo, Jian Zhang, Changlei Fu, Hui Cao, Mengqi Jin, and Zhihui Cai, 2020, Petrological, geochronological, and geochemical potential accounting for continental subduction and exhumation: A case study of felsic granulites from South Altyn Tagh, northwestern China: GSA Bulletin, <https://doi.org/10.1130/B35459.1>.

## Data Repository

**Figure DR1.** Compositional profile and mapping of various types of plagioclase crystals from the felsic granulites in the Bashiwake area, South Altyn Tagh.

**Figure DR2.** Hf isotopic characteristics for the different domains in zircons of the felsic granulites in the Bashiwake area, South Altyn Tagh. The crustal evolution path assuming a crustal  $^{176}\text{Lu}/^{177}\text{Hf}$  ratio of 0.011 (after Wedepohl, 1995).

### **TABLES: RESULTS OF ZIRCON AND MONAZITE U-PB DATING AND HF ISOTOPE OF ZIRCON**

**Table DR1.** U-Pb isotopic data of zircon from felsic granulite (AQ11–3-3.1) in the Bashiwake area, South Altyn Tagh.

**Table DR2.** Rare elements of zircon (LA-ICP-MS) from felsic granulite (AQ11–3-3.1) in the Bashiwake area, South Altyn Tagh.

**Table DR3.** Analytical data of Hf isotope of zircons from the felsic granulite (AQ11–3-3.1) in the Bashiwake area, South Altyn Tagh.

**Table DR4.** U-Pb isotopic data of monazite from the felsic granulite (AQ11–3-3.1) in the Bashiwake area, South Altyn Tagh.

**Table DR5.** REEs (ppm) of monazite (LA-ICP-MS) from the felsic granulite (AQ11–3-3.1) in the Bashiwake area, South Altyn Tagh.

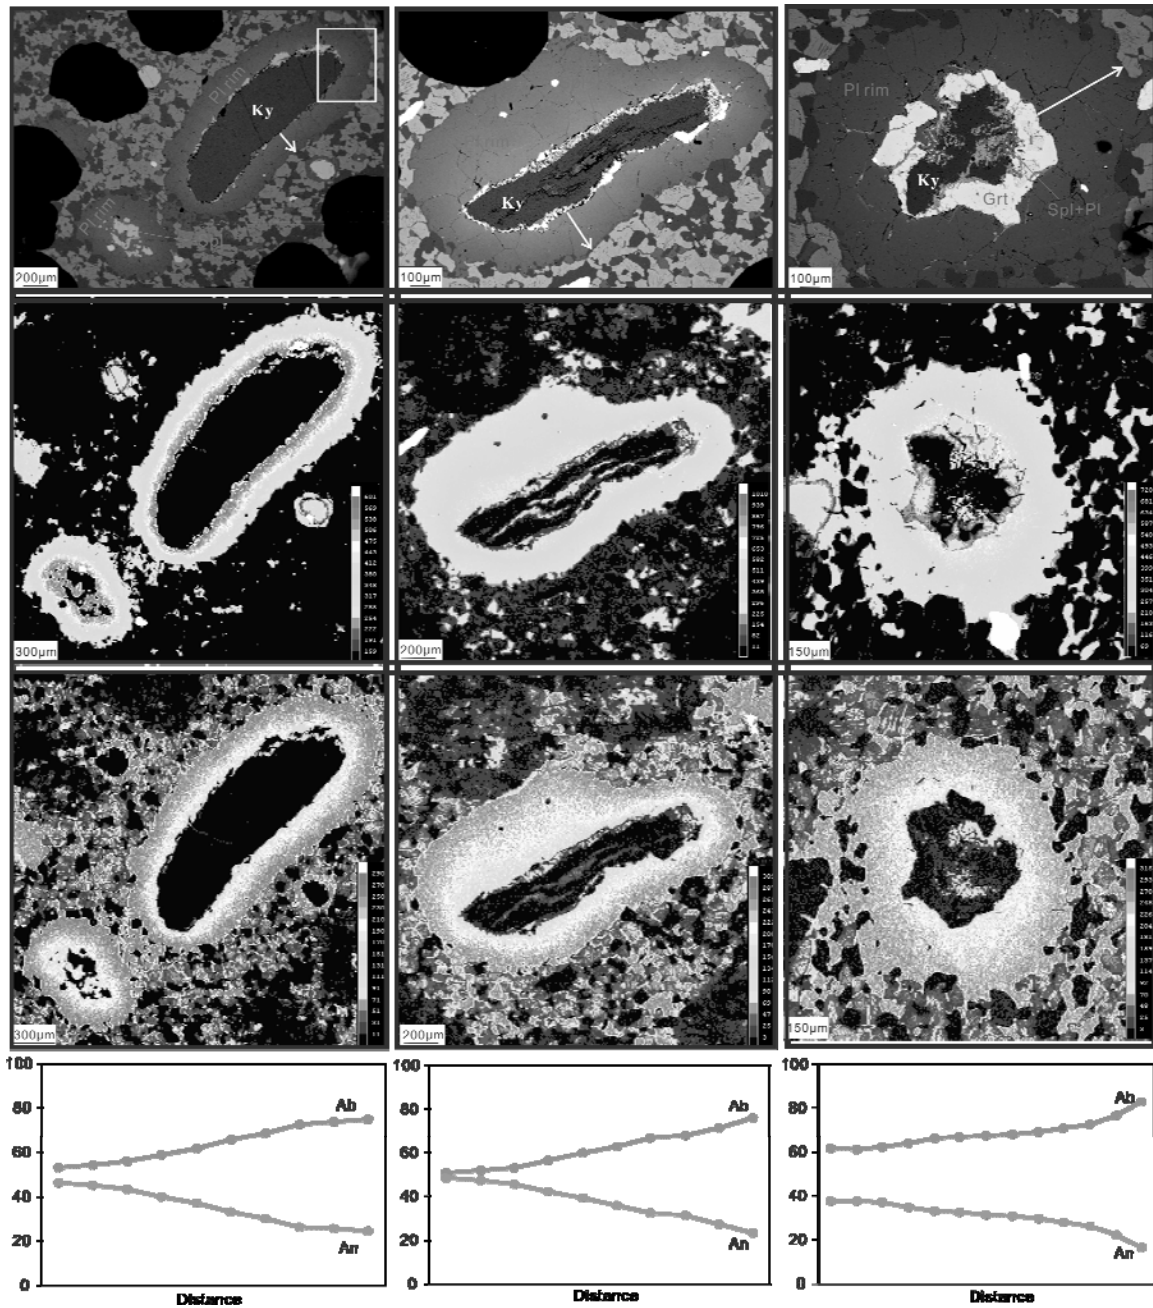

Figure DR1. Compositional profile and mapping of various types of plagioclase crystals from the felsic granulites in the Bashiwake area, South Altyn Tagh.

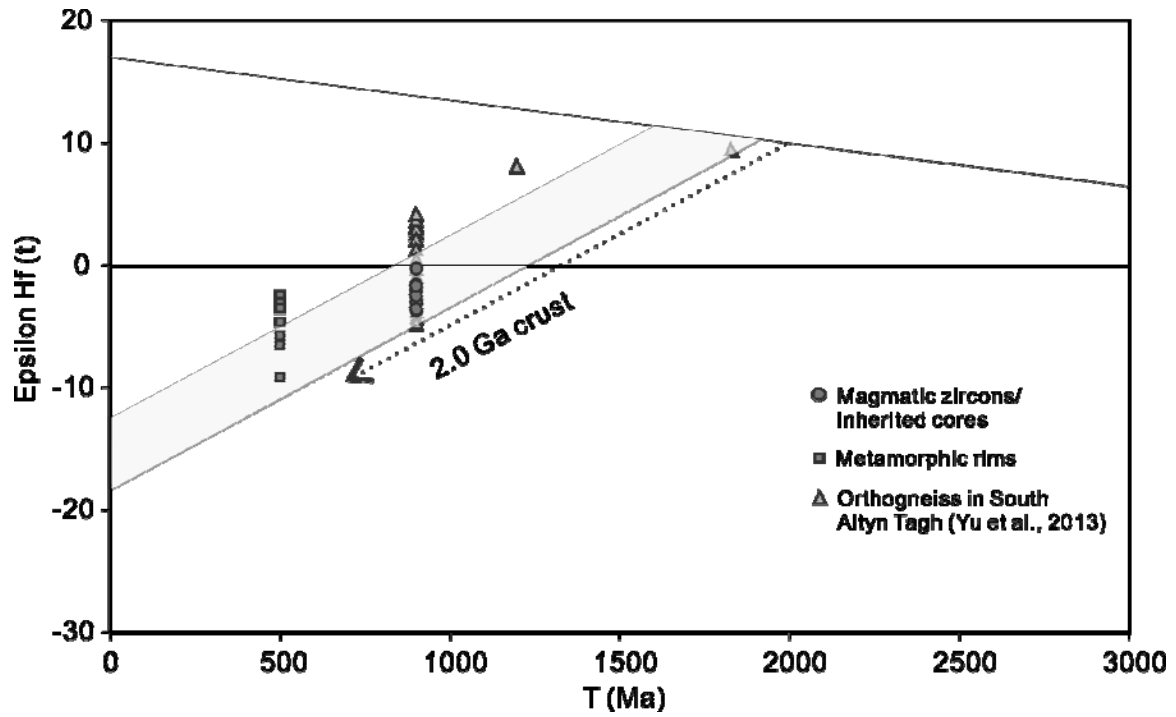

Figure DR2. Hf isotopic characteristics for the different domains in zircons of the felsic granulites in the Bashiwake area, South Altyn Tagh. The crustal evolution path assuming a crustal  $^{176}\text{Lu}/^{177}\text{Hf}$  ratio of 0.011 (after [Wedepohl, 1995](#)).
